# Supplementary material for: Systemic Treatment With Nicotinamide Riboside Is Protective in a Mouse Model of Light-Induced Retinal Degeneration
Source: PubMed Central journal article supplement — Invest Ophthalmol Vis Sci. 2020 Aug 27;61(10):47. doi: 10.1167/iovs.61.10.47 (PMC7452859; doi:10.1167/iovs.61.10.47), 2020-08-27
Supplement: iovs-61-10-47_s001.pdf [file iovs-61-10-47_s001.pdf]

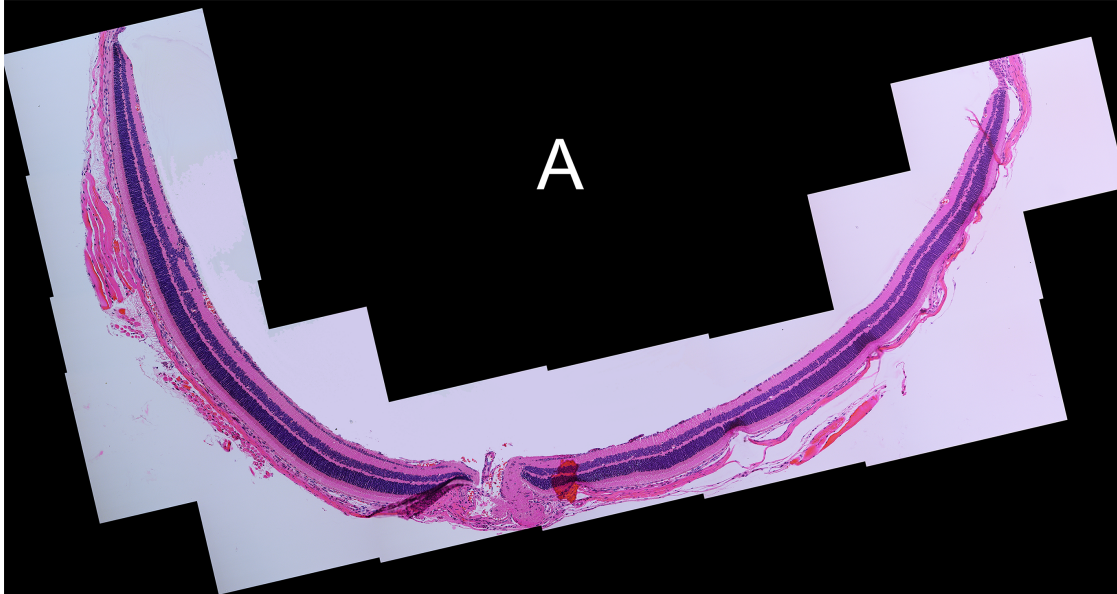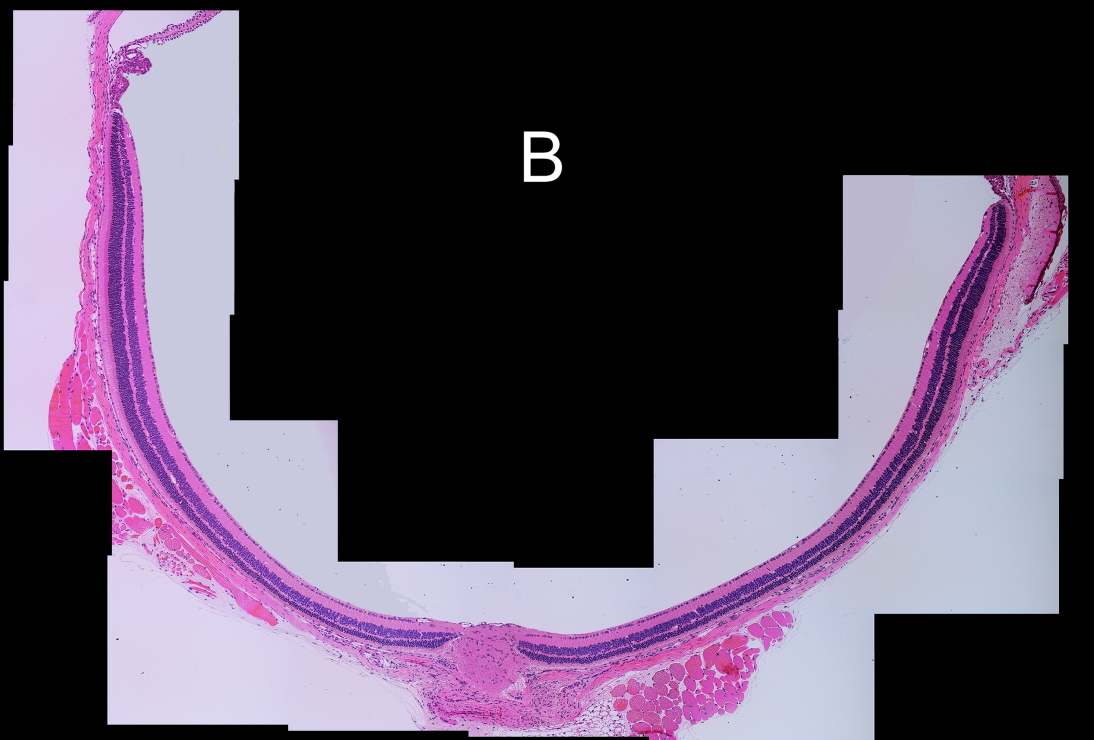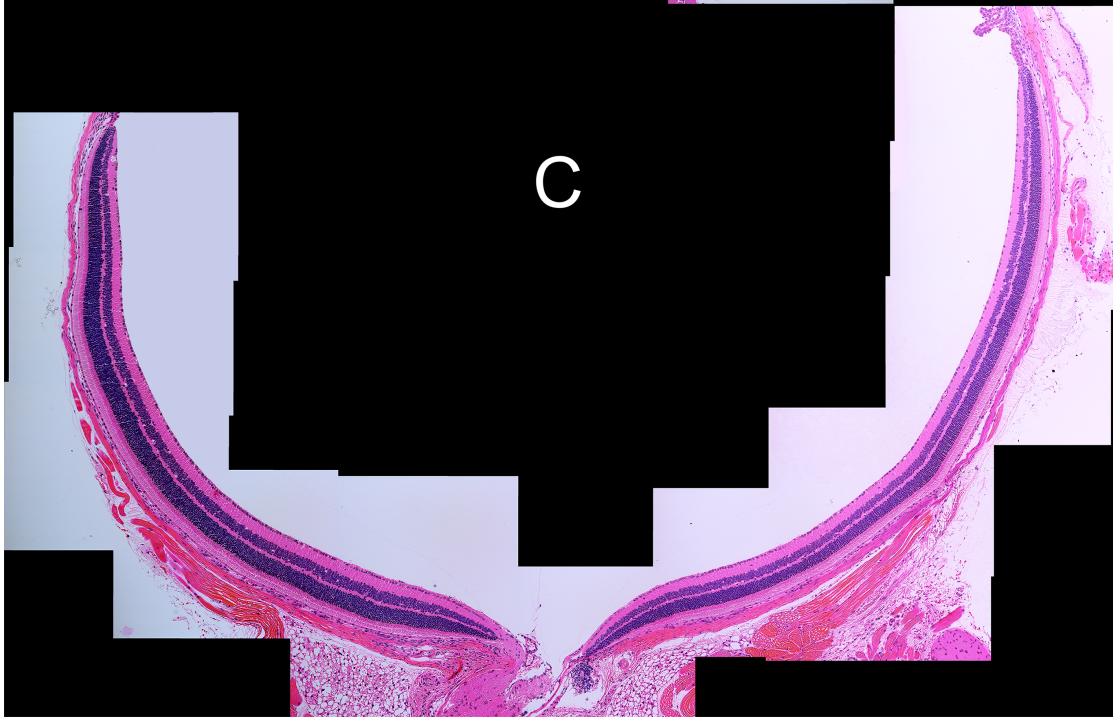

**Figure S1. NR treatment preserves nuclei of the outer nuclear layer in the LIRD**

**mice.** A week after toxic light exposure, mice were euthanized and ocular sections stained with hematoxylin and eosin (H&E). Representative H&E images of complete retina sections from each treatment group are shown. **Panel A:** Section from a PBS-treated mouse exposed to dim light shows unperturbed ONL across the span of the retina. **Panel B:** Section from a PBS-treated mouse with toxic light exposure shows extreme thinning in the central, superior (right side of section) ONL. **Panel C:** Section from a NR-treated mouse exposed to toxic light shows similar ONL thickness as that of control mouse.
