# Supplementary material for: Systemic Treatment With Nicotinamide Riboside Is Protective in a Mouse Model of Light-Induced Retinal Degeneration
Source: PubMed Central journal article supplement — Invest Ophthalmol Vis Sci. 2020 Aug 27;61(10):47. doi: 10.1167/iovs.61.10.47 (PMC7452859; doi:10.1167/iovs.61.10.47), 2020-08-27
Supplement: iovs-61-10-47_s002.pdf [file iovs-61-10-47_s002.pdf]

A

B

C

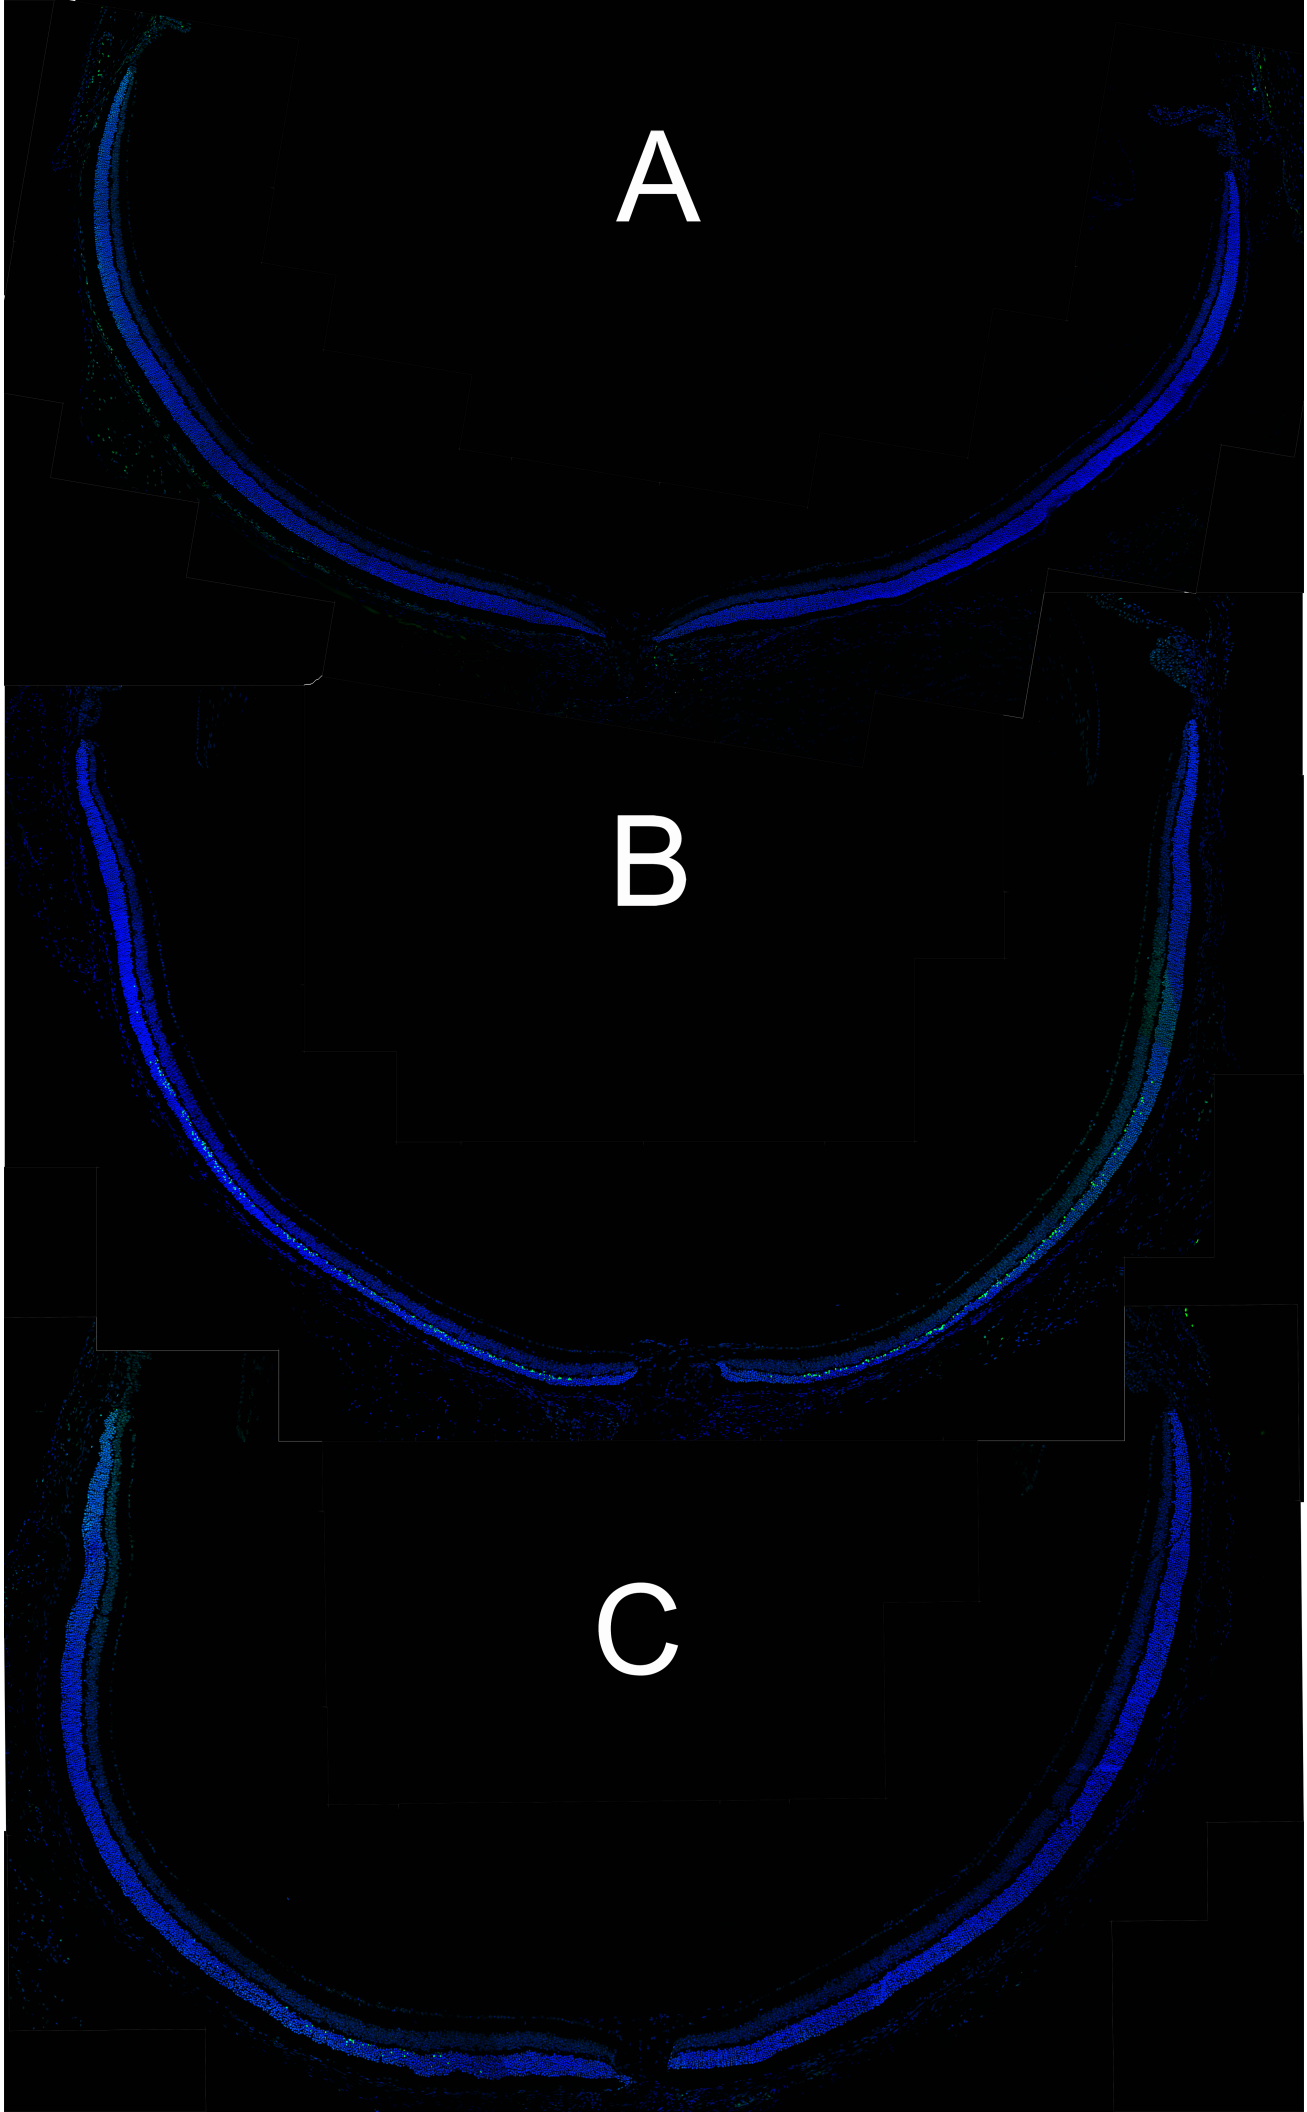

**Figure S2. NR treatment prevents increases TUNEL-positive cells following induction of LIRD.** A week after toxic light exposure the mice were euthanized and ocular sections stained for TUNEL (green) and DAPI (blue). Representative images of complete retina sections from each treatment group are shown. The right half of each section is dorsal/superior and the left half is ventral periphery/inferior. **Panel A:** Section from a PBS-treated mouse exposed to dim light shows little to no TUNEL-positive ONL nuclei across the span of the retina. **Panel B:** Section from a PBS-treated mouse with toxic light exposure shows numerous TUNEL-positive ONL nuclei in both superior and inferior halves. **Panel C:** Section from a NR-treated mouse exposed to toxic light shows much fewer TUNEL-positive ONL nuclei relative to PBS-treated mouse section.
